# Supplementary material
Source: PubMed Central journal article supplement (PMC7108915)
Supplement: jci-130-134699-s328.pdf [file jci-130-134699-s328.pdf]

# Figure S1

A

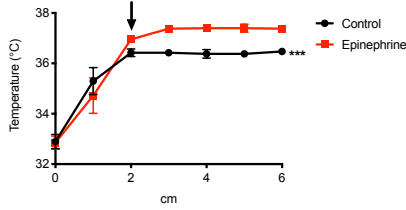

B

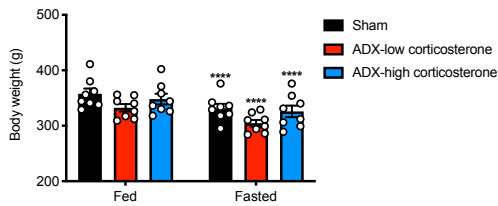

C

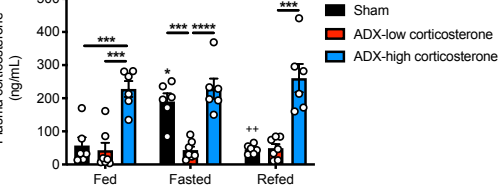

D

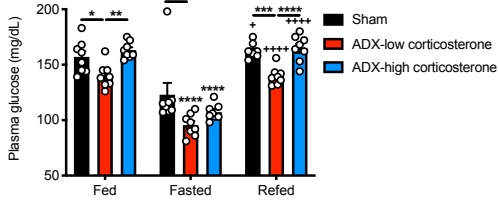

E

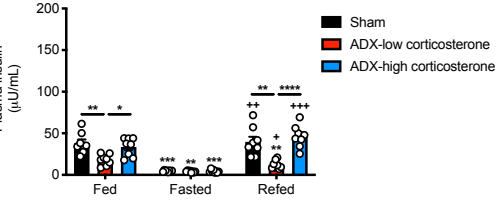

F

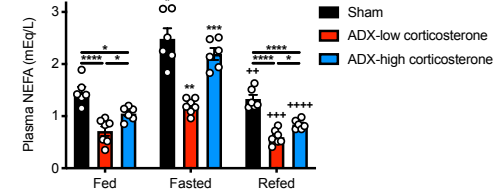

G

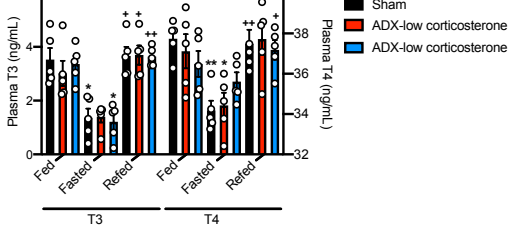

H

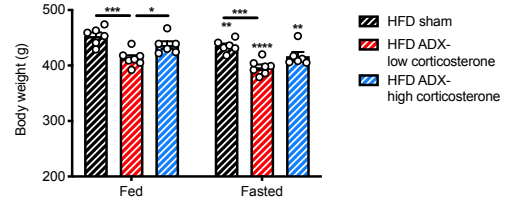

I

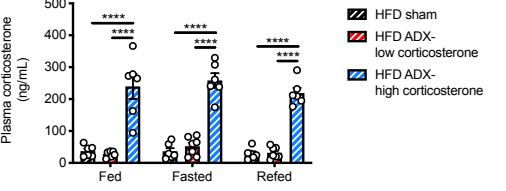

J

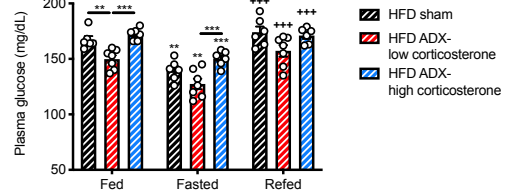

K

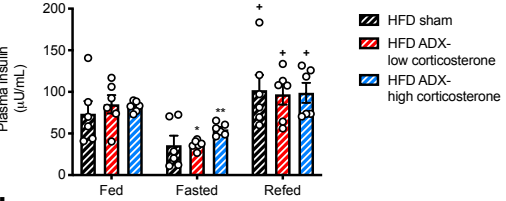

L

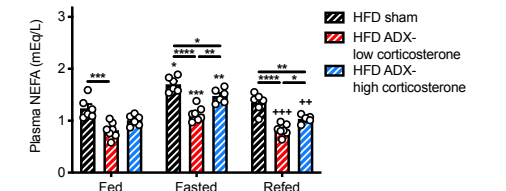

**Figure S1. Adrenalectomized rats lack meal thermogenesis.** (A) Temperature measured 0-6 cm into the rectum in 48 hr fasted rats±a bolus injection of epinephrine. N=4 per group. All other body temperature data in this manuscript were obtained 2 cm into the rectum (arrow). (B) Body weight. In panels (B) and (H), \*\* $P < 0.01$ , \*\*\*\* $P < 0.0001$  vs. fed rats by paired Student's t-test. (C)-

(G) Plasma corticosterone, glucose, insulin, NEFA, T3, and T4 concentrations. \* $P < 0.05$ , \*\* $P < 0.01$ , \*\*\* $P < 0.001$ , \*\*\*\* $P < 0.0001$ , + $P < 0.05$ , ++ $P < 0.01$ , +++ $P < 0.001$ , ++++ $P < 0.0001$ . In panels (C)-(L), \* directly over bars denotes comparisons to fed rats, and + directly over bars denotes comparisons to fasted rats. The same rats were compared under fed, fasted, and refeed conditions using repeated measures ANOVA with Bonferroni's multiple comparisons test, while groups were compared by ANOVA with Bonferroni's multiple comparisons test. (H) Body weight. Panels (H)-(L) show data from the same rats in panels (A)-(G), following 10 days of high fat feeding. (I)-(L) Plasma corticosterone, glucose, insulin, and NEFA concentrations. In all panels, data are the mean  $\pm$  S.E.M. If no symbol appears, groups and time points are not statistically different.

Figure S2

A

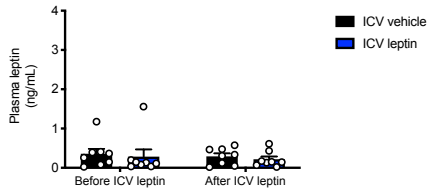

B

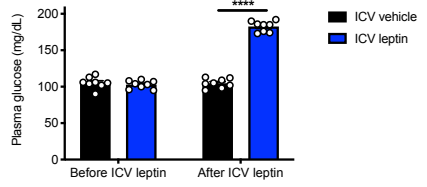

C

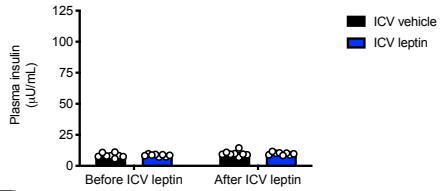

D

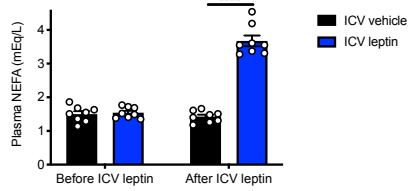

E

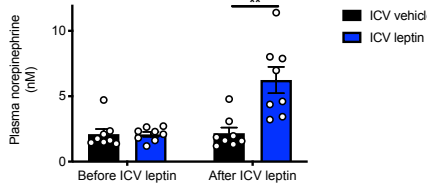

F

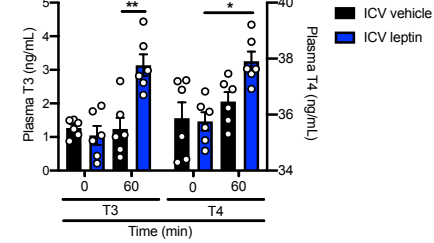

G

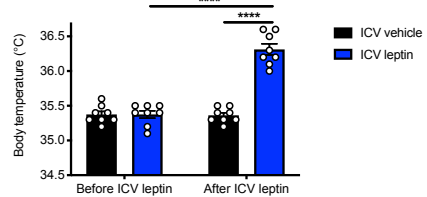

H

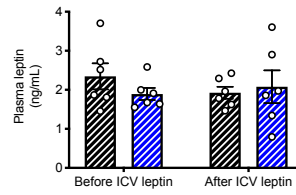

I

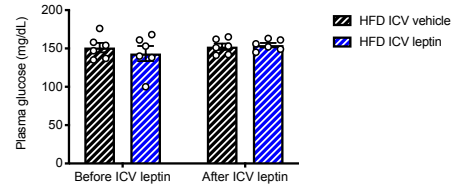

J

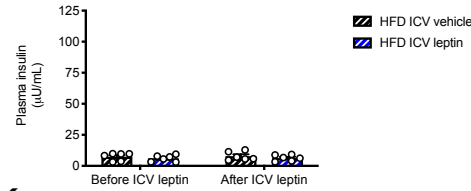

K

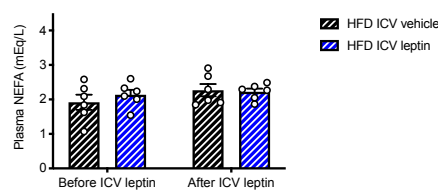

L

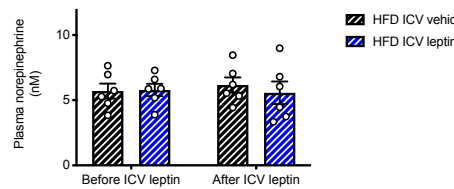

M

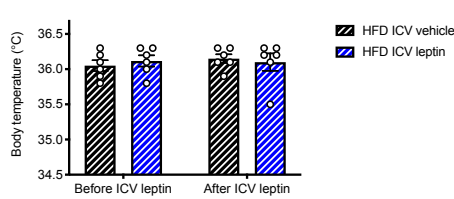

**Figure S2. Leptin promotes thermogenesis through a central effect.** (A)-(F) Plasma leptin, glucose, insulin, NEFA, norepinephrine, T3, and T4 concentrations in 48 hr fasted rats. All “before ICV leptin” data were obtained 30 min after the initiation of an infusion of somatostatin, and “after ICV leptin” data were obtained 30 min after an ICV injection of leptin (or PBS control), with somatostatin infusion continuing. Rats were compared before and after leptin by the 2-tailed paired Student’s t-test, and groups were compared by the 2-tailed unpaired Student’s t-test. In all panels,  $**P<0.01$ ,  $****P<0.0001$ . (G) Body temperature. (H)-(L) Plasma leptin, glucose, insulin, NEFA, and norepinephrine concentrations in the same rats shown in panels (A)-(G), after 10 days of high fat feeding. (M) Body temperature. In all panels, the mean $\pm$ S.E.M. is shown. If no symbol appears, groups and time points are not statistically different.

Figure S3

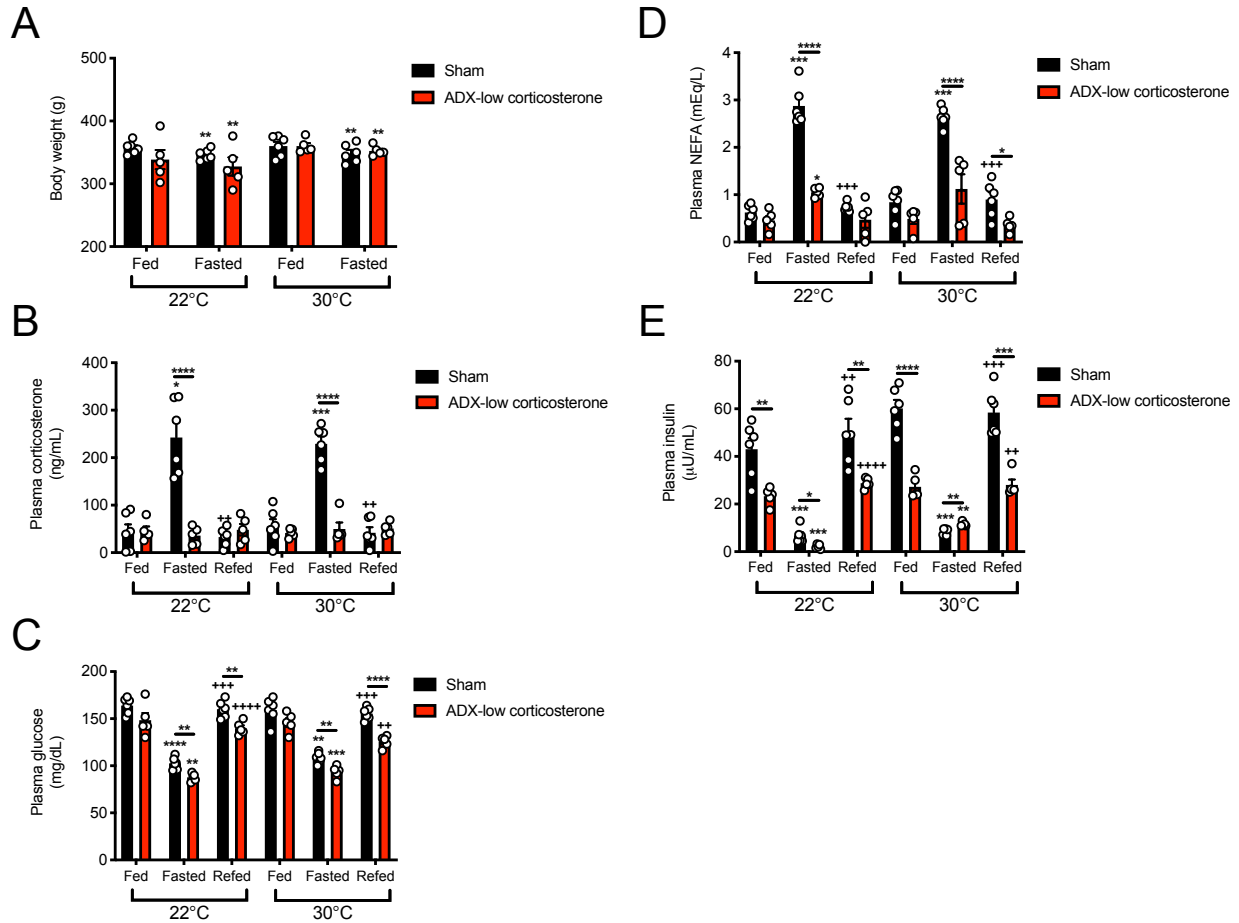

**Figure S3. Ambient temperature does not affect the impact of refeeding on postprandial increases in body temperature.** (A) Body weight in rats housed at thermoneutrality for one week. (B)-(E) Plasma corticosterone, glucose, insulin, and NEFA concentrations. In all panels, \* $P < 0.05$ , \*\* $P < 0.01$ , \*\*\* $P < 0.001$ , \*\*\*\* $P < 0.0001$ ; ++ $P < 0.01$ , +++ $P < 0.001$ . \* directly over bars denotes comparisons to fed rats, and + directly over bars denotes comparisons to fasted rats. If no symbol appears, groups and time points are not statistically different.

Figure S4

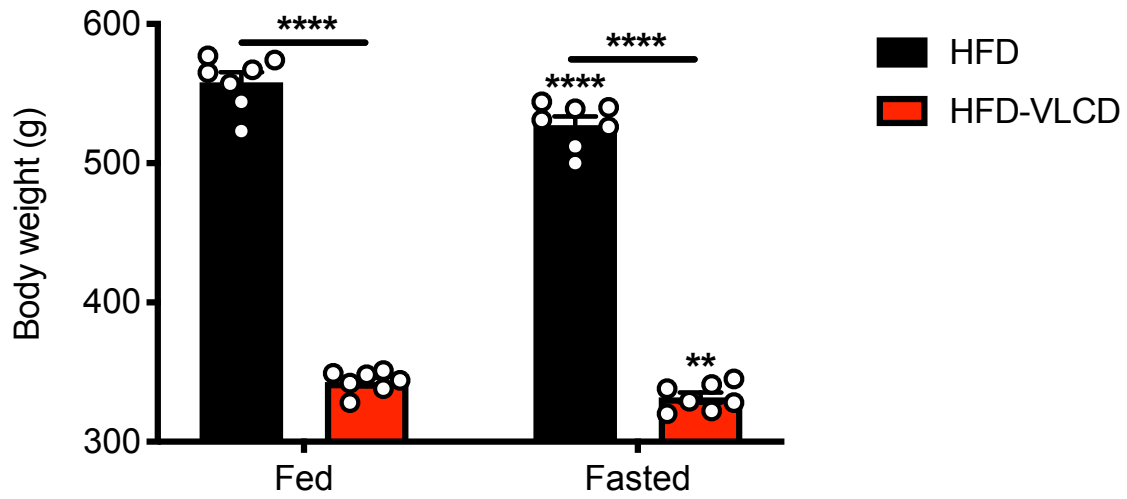

**Figure S4. Normalizing body weight restores the leptin-catecholamine-thermogenic response to fasting and refeeding.** Body weight before and after weight normalization via a very low calorie diet.

Figure S5

A

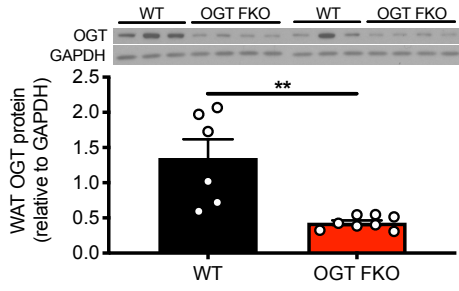

B

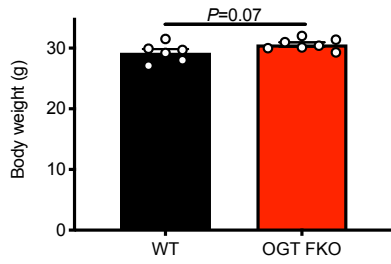

C

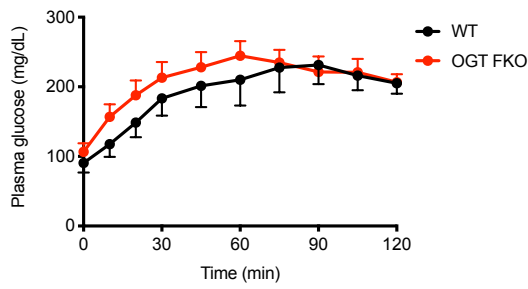

D

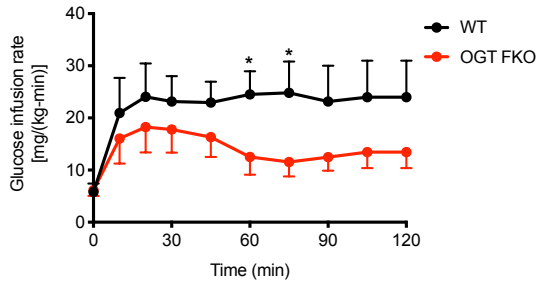

E

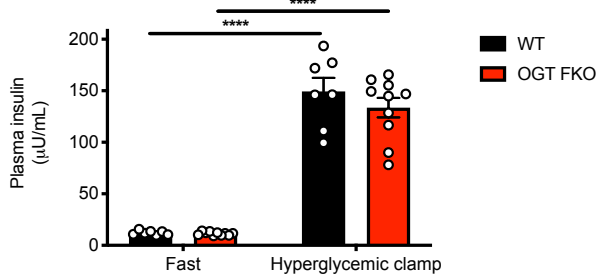

F

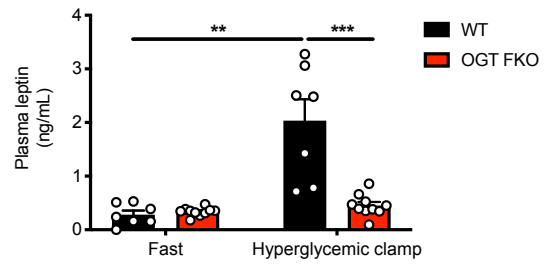

G

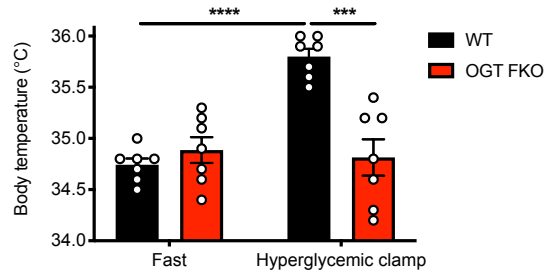

H

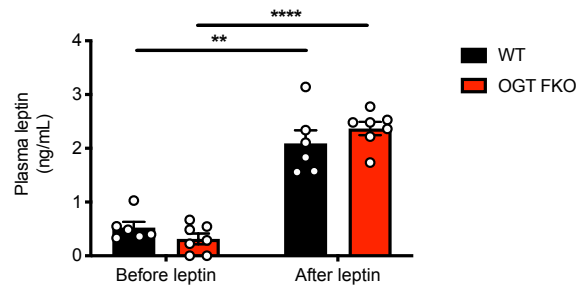

I

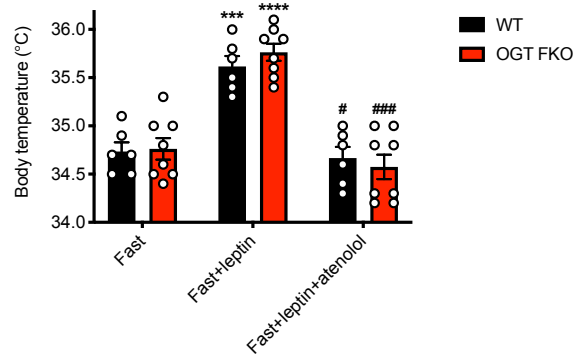

**Figure S5. Leptin is required for postprandial increases in body temperature.** (A) Epididymal white adipose tissue OGT expression in inducible OGT FKO mice and their WT littermate controls. Full, uncut gels are shown in Fig. S15. In all panels, \* $P < 0.05$ , \*\* $P < 0.01$ , \*\*\* $P < 0.001$ , \*\*\*\* $P < 0.0001$ . Unpaired t-tests were used for comparisons between genotypes and paired t-tests (panels (E)-(H)) or ANOVA with Bonferroni's multiple comparisons test (panel (I)) were used for within-genotype comparisons. (B) Body weight. (C)-(D) Plasma glucose and glucose infusion rate during a hyperglycemic clamp. (E)-(F) Plasma insulin and leptin concentrations at time 0 and 120 min of the hyperglycemic clamp. (G) Body temperature and time 0 and 120 min of the hyperglycemic clamp. (H) Plasma leptin concentrations before and 30 min after a bolus injection of leptin in fasted mice. (I) Body temperature. \*\*\* $P < 0.001$ , \*\*\*\* $P < 0.0001$  vs. fasted mice; # $P < 0.05$ , ### $P < 0.001$  vs. fasted, leptin-injected mice. Data are the mean  $\pm$  S.E.M. If no symbol appears, groups and time points are not statistically different.



Figure S6

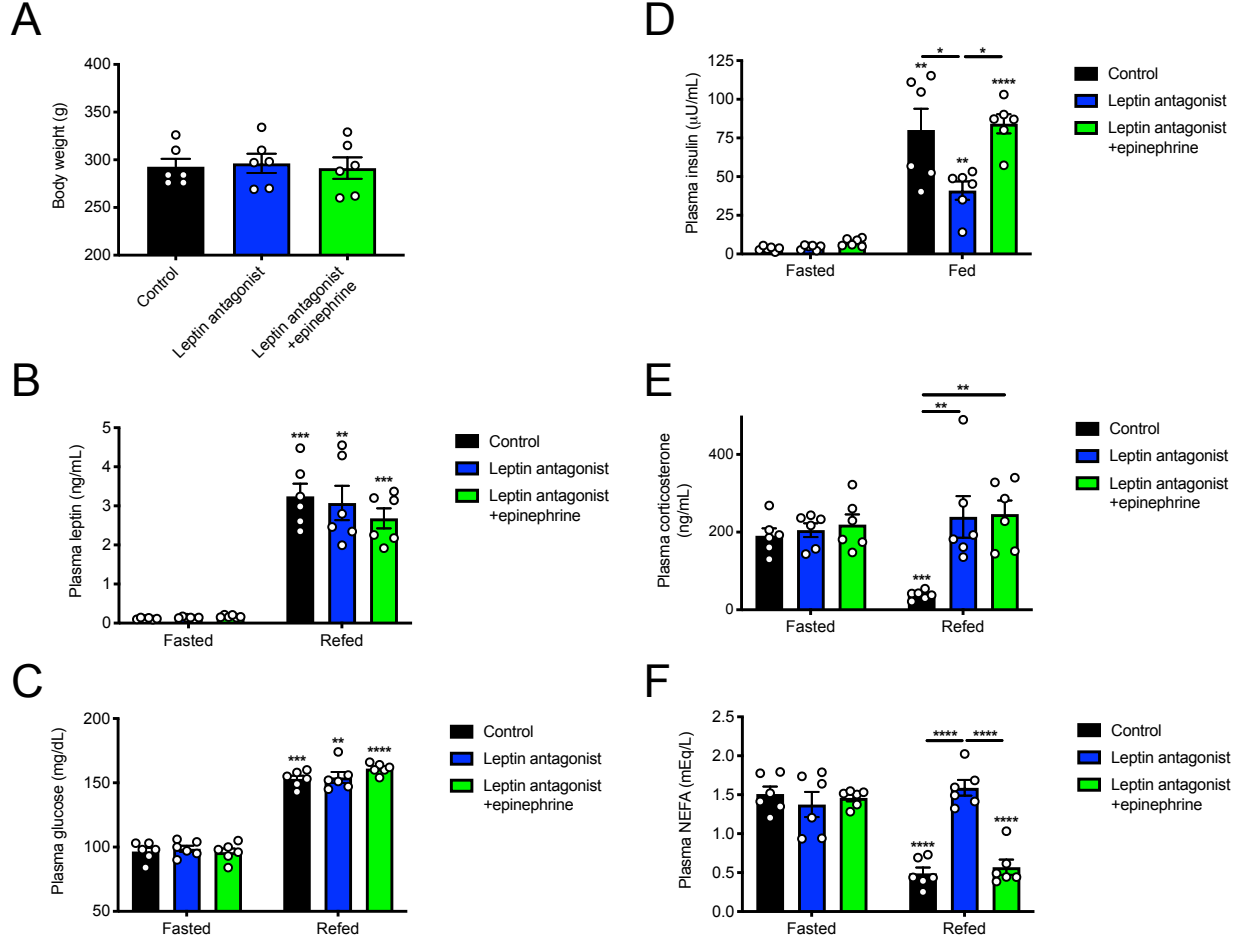

**Figure S6. Leptin is required for postprandial increases in body temperature.** (A) Body weight in rats treated with a single injection of a small molecule leptin antagonist. (B)-(E) Plasma leptin, glucose, insulin, and NEFA concentrations. In all panels, \* $P < 0.05$ , \*\* $P < 0.01$ , \*\*\* $P < 0.001$ , \*\*\*\* $P < 0.0001$ . Asterisks directly over bars denote comparisons to fasted rats. In all panels, the mean  $\pm$  S.E.M. are shown. If no symbol appears, groups and time points are not statistically different.

# Figure S7

A

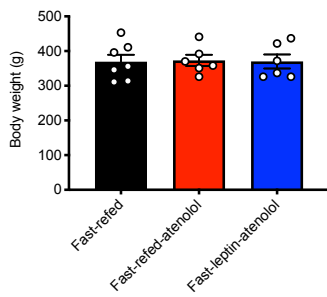

B

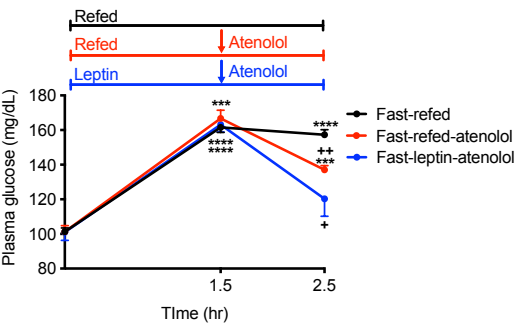

C

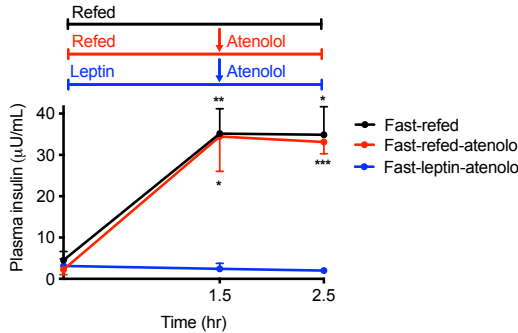

D

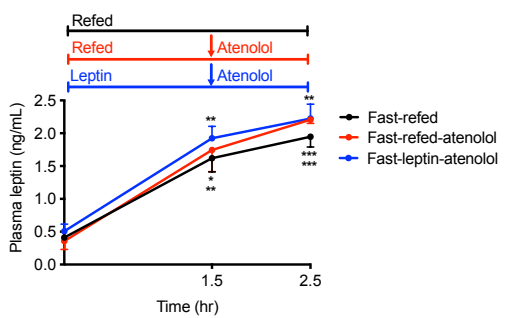

E

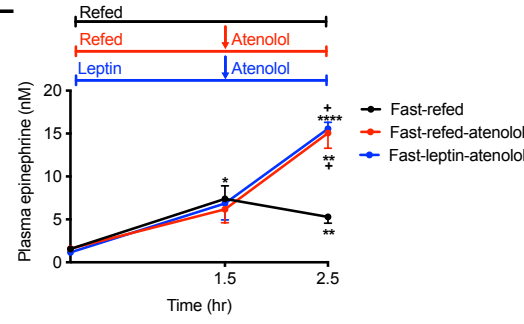

F

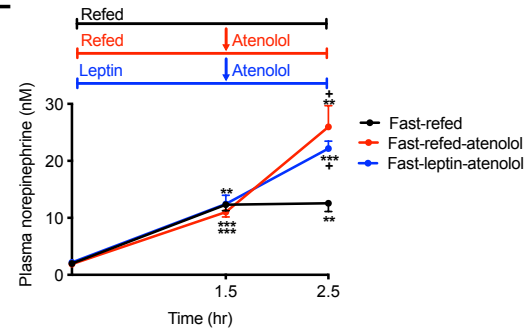

G

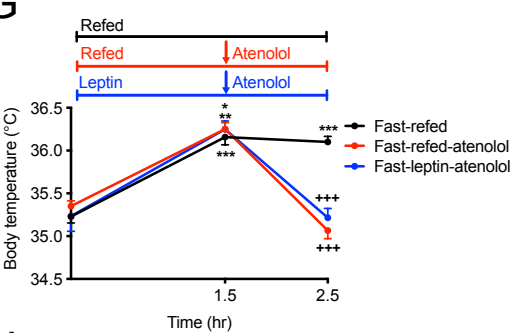

H

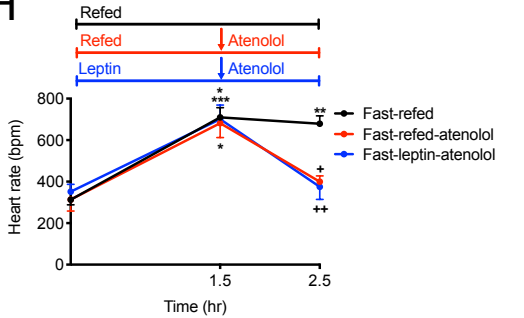

**Figure S7.  $\beta$ -adrenergic activity mediates leptin's effect to drive postprandial increases in body temperature.** (A) Body weight. (B)-(F) Plasma glucose, insulin, leptin, epinephrine, and norepinephrine concentrations. (G) Body temperature. (H) Heart rate. In all panels, \* $P$ <0.05, \*\* $P$ <0.01, \*\*\* $P$ <0.001, \*\*\*\* $P$ <0.0001 vs. time 0, + $P$ <0.05, ++ $P$ <0.01 vs. 90 min by repeated-measures ANOVA with Bonferroni's multiple comparisons test. Data are the mean $\pm$ S.E.M. of  $n$ =6-7 per group. If no symbol appears, groups and time points are not statistically different.

Figure S8

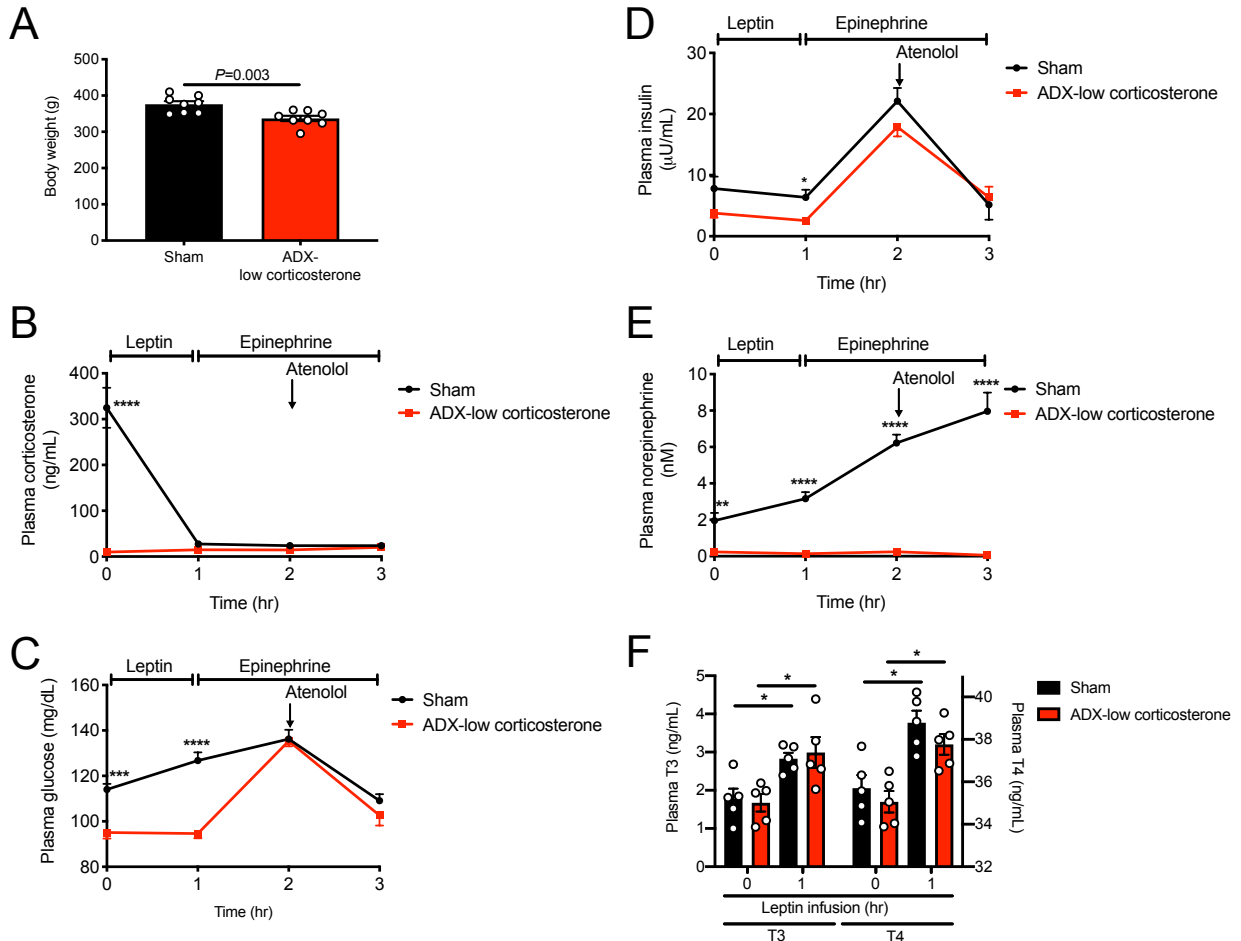

**Figure S8.  $\beta$ -adrenergic activity mediates leptin's effect to drive postprandial increases in body temperature.** (A) Body weight. (B)-(F) Plasma corticosterone, glucose, insulin, norepinephrine, T3, and T4 concentrations. \**P*<0.05, \*\**P*<0.01, \*\*\*\**P*<0.0001 by the 2-tailed unpaired Student's *t*-test. Data are the mean $\pm$ S.E.M. of *n*=8 per group. If no symbol appears, groups and time points are not statistically different.

# Figure S9

A

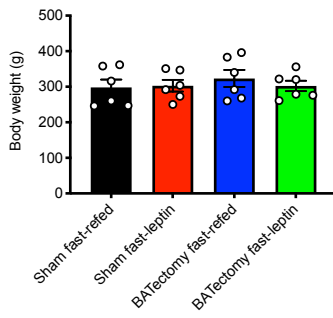

B

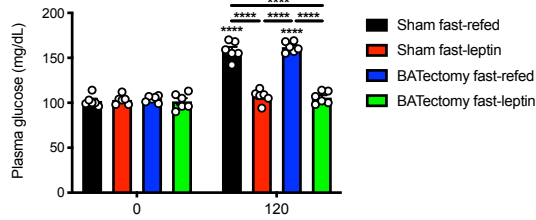

C

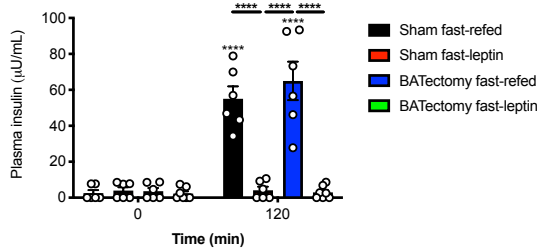

D

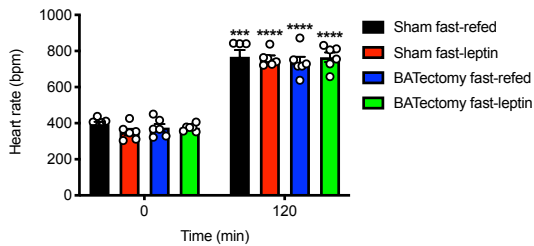

E

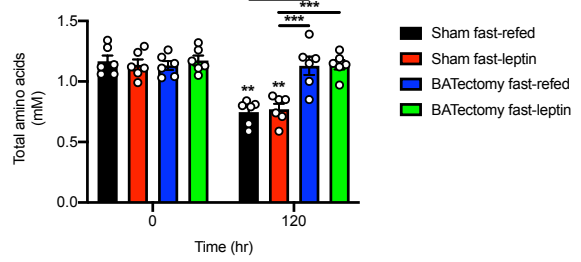

F

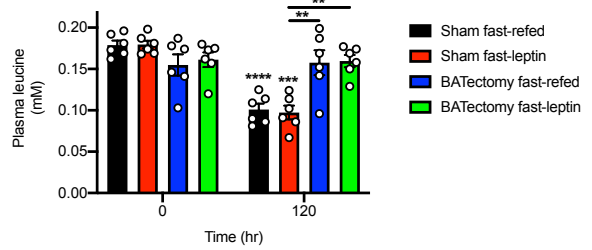

G

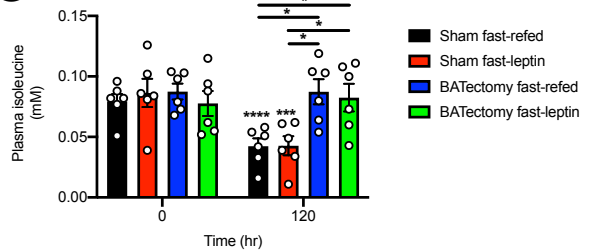

**Figure S9. BAT accounts for most if not all of feeding- and leptin-induced increases in body temperature.** (A) Body weight one week following BATectomy or sham surgery. (B)-(C) Plasma glucose and insulin concentrations. (D) Heart rate. (E) Total plasma amino acid concentrations. (F)-(G) Plasma branched-chain amino acid (leucine and isoleucine, respectively) concentrations. In all panels, data are presented as the mean±S.E.M. \* $P<0.05$ , \*\* $P<0.01$ , \*\*\* $P<0.001$ , \*\*\*\* $P<0.0001$ . Symbols over bars refer to the same group at time zero by the 2-tailed paired Student's t-test. Comparisons between groups were performed by ANOVA with Bonferroni's multiple comparisons test. If no symbol appears, groups and time points are not statistically different.

Figure S10

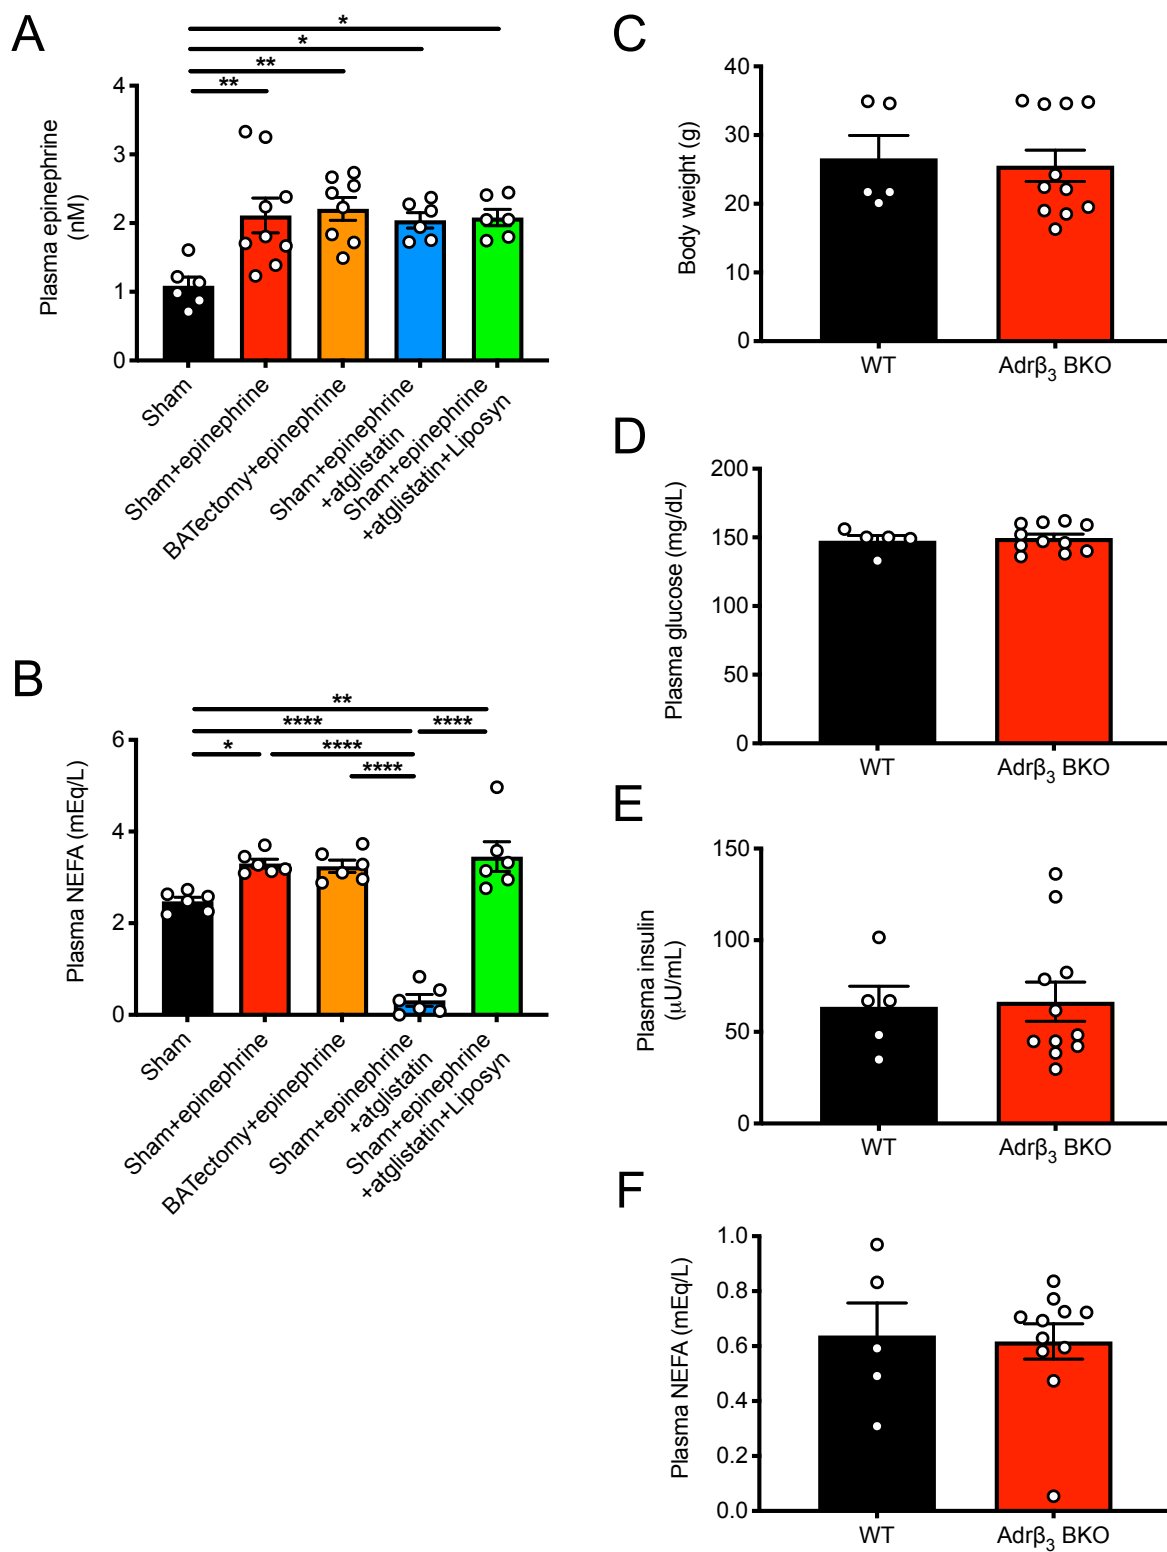

**Figure S10. BAT  $\beta_3$  adrenergic activity-mediated lipolysis is required for feeding-induced increases in body temperature.** (A)-(B) Plasma epinephrine and NEFA concentrations in 48 hr fasted rats treated with the perturbations listed. Groups were compared by ANOVA with Bonferroni's multiple comparisons test. (C) Body weight in inducible BAT-specific Adr $\beta_3$  knockout mice. (D)-(F) Plasma glucose, insulin, and NEFA concentrations. n=5 (WT) and 11 (Adr $\beta_3$  BKO). Data are the mean $\pm$ S.E.M. No significant differences were observed between groups using the 2-tailed unpaired Student's t-test.

# Figure S11

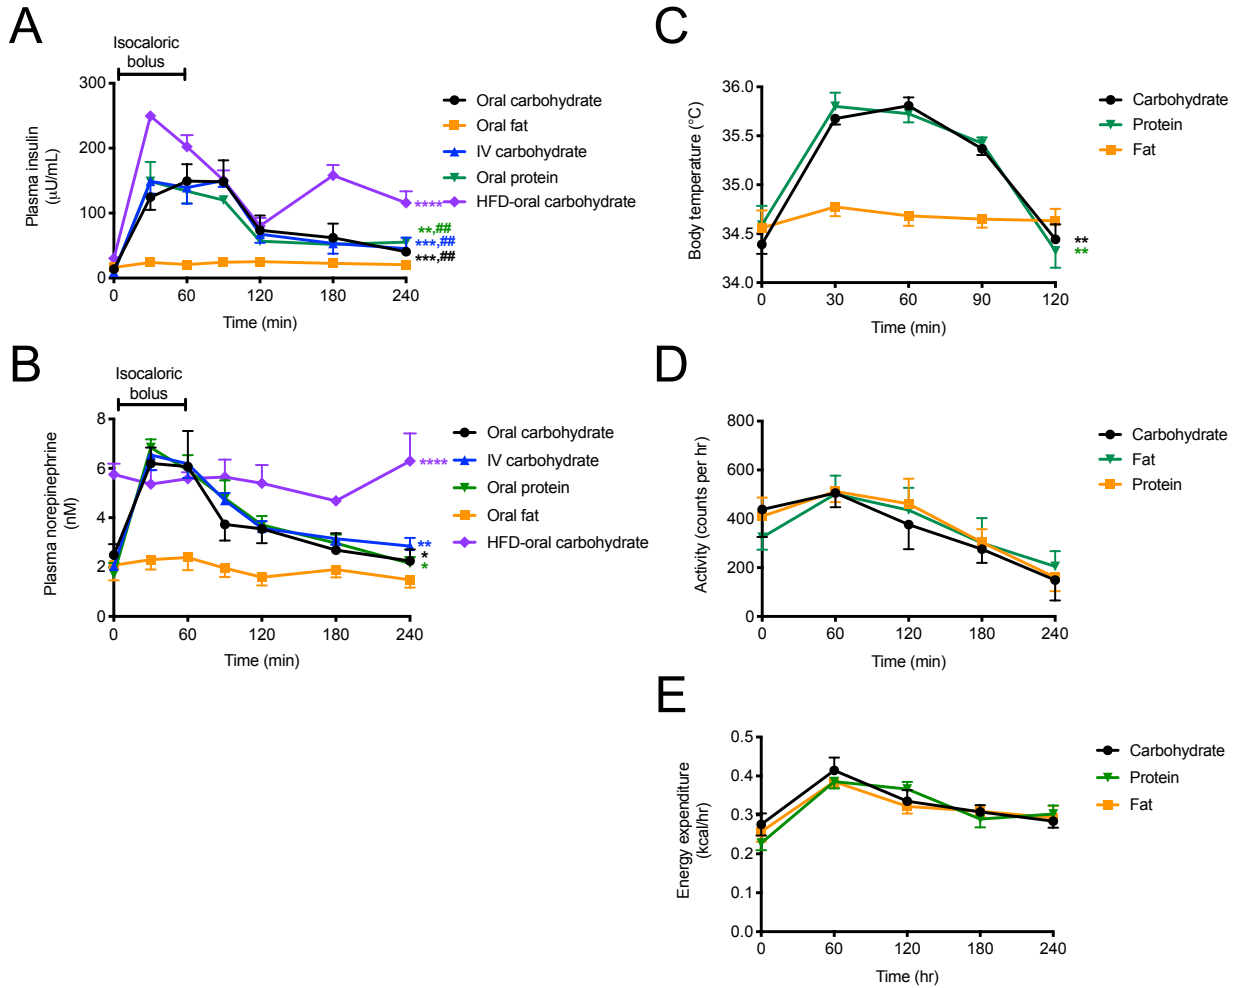

**Figure S11. Increases in postprandial body temperature, but not energy expenditure, depend on meal composition.** (A)-(B) Plasma insulin and norepinephrine concentrations in rats.  $n=4$  (oral protein), 5 (HFD-oral carbohydrate), 6 (oral carbohydrate, oral fat), or 8 (IV carbohydrate). The area under the curve was compared by ANOVA with Bonferroni's multiple comparisons test.  $*P<0.05$ ,  $**P<0.01$ ,  $***P<0.001$ ,  $****P<0.0001$  vs. oral fat,  $###P<0.01$  vs. HFD-oral carbohydrate. (C)-(D) Body temperature, activity, and energy expenditure following an oral gavage of an isocaloric carbohydrate (dextrose), fat (canola oil), or protein (casein) meal in 24 hr fasted mice.  $**P<0.01$  vs. fat.  $n=8$  (protein) or 12 (carbohydrate, fat). In all panels, data are the mean  $\pm$  S.E.M. If no symbol appears, groups are not statistically different.

Figure S12

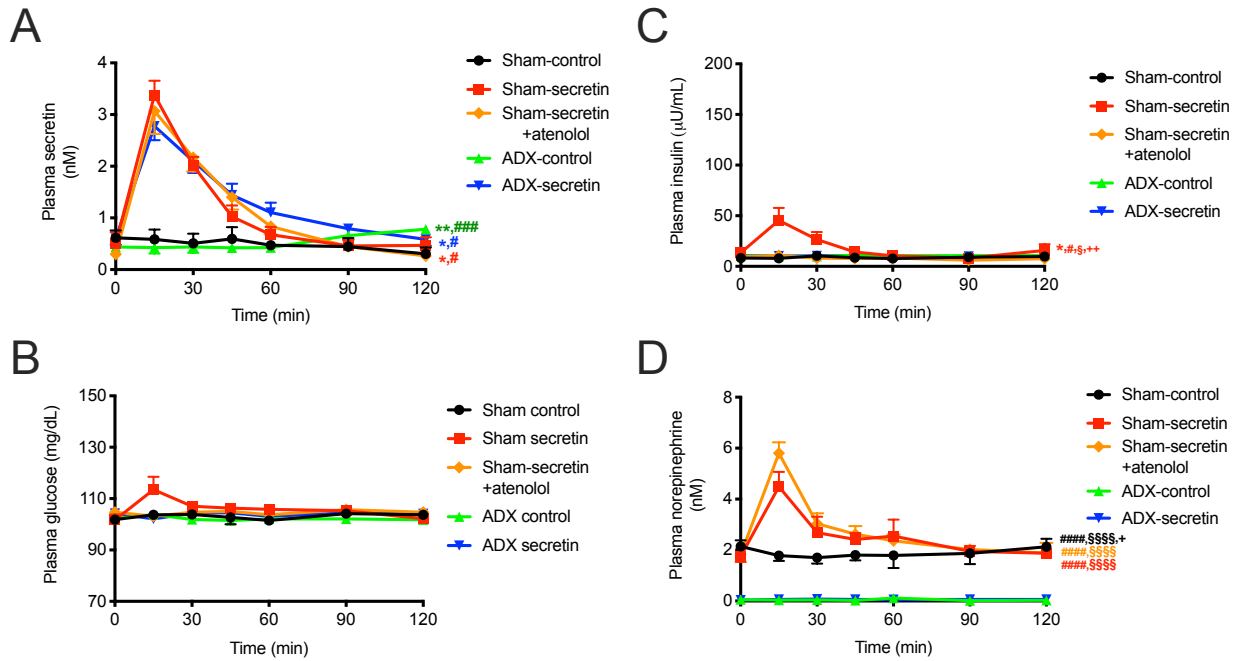

**Figure S12. Secretin has a modest, catecholamine-dependent effect to cause thermogenesis.** (A)-(D) Plasma secretin, glucose, insulin, and norepinephrine concentrations. \* $P < 0.05$ , \*\* $P < 0.01$  vs. sham-control, # $P < 0.05$ , ### $P < 0.001$ , #### $P < 0.0001$  vs. ADX-control, § $P < 0.05$ , §§§§ $P < 0.0001$  vs. ADX-secretin, + $P < 0.05$ , ++ $P < 0.01$  vs. sham-secretin+atenolol by ANOVA with Bonferroni's multiple comparisons test (comparison of AUC). In all panels, data are the mean  $\pm$  S.E.M. of  $n = 6-8$  per group. If no symbol appears, groups are not statistically different.



Figure S13

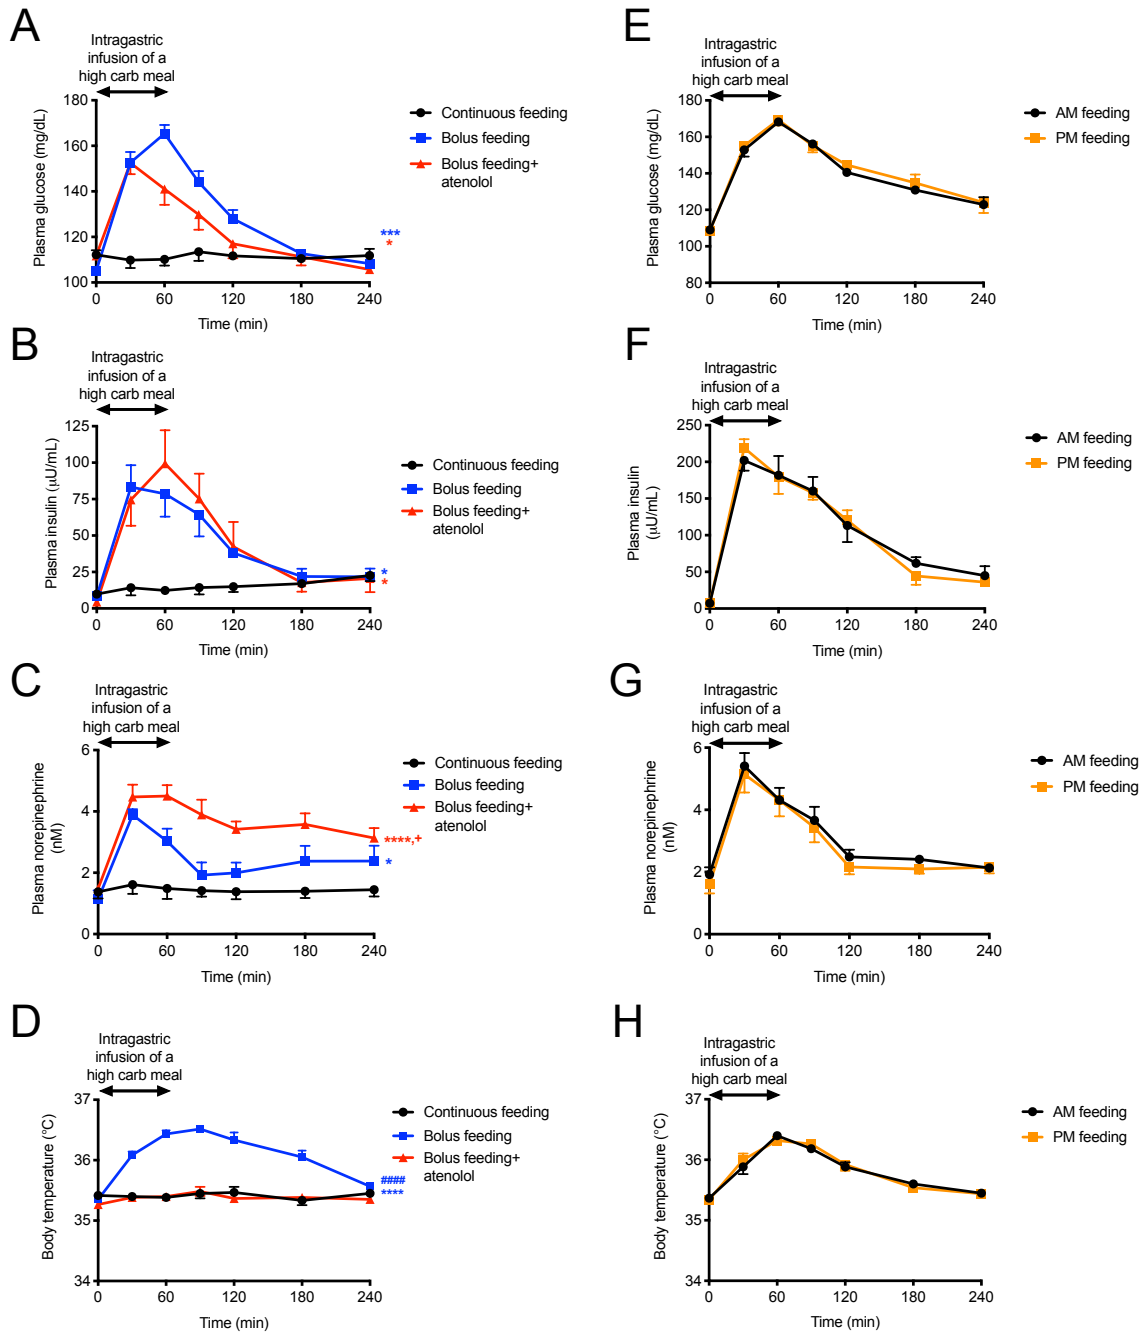

**Figure S13. Bolus feeding minimizes weight gain through a  $\beta$ -1 adrenergic effect to promote thermogenesis.** (A)-(C) Plasma glucose, insulin, and norepinephrine concentrations during and after the last meal (day 10), or during continuous feeding (day 10). In panels (A)-(D),  $*P < 0.05$ ,  $***P < 0.001$ ,  $****P < 0.0001$  vs. continuous feeding and  $#####P < 0.0001$  vs. bolus feeding+atenolol comparing the 240 min AUC by ANOVA with Bonferroni's multiple comparisons test. If no symbol appears, groups are not statistically different. (D) Body temperature. (E)-(G) Plasma glucose, insulin, and norepinephrine concentrations during the last meal after 10 days of morning or evening feeding. (H) Body temperature. In panels (E)-(H), no differences were observed in AUC compared by the 2-tailed unpaired Student's t-test.

# Figure S14

- Lean (fasted)
- Lean (carb bolus fed)
- Lean (fat bolus fed)
- Lean (protein bolus fed)
- Lean (AM fed - fasted)
- Lean (AM fed)
- Lean (PM fed - fasted)
- Lean (PM fed)
- Lean (continuously fed)
- Lean (secretin treated)
- ADX (fed)
- ADX (fasted)
- Lean (low dose leptin infused)
- Lean (medium dose leptin infused)
- Lean (high dose leptin infused)
- Lean (low dose epinephrine infused)
- Lean (high dose epinephrine infused)
- Obese (carb bolus fed)
- Obese (fasted)
- Obese-VLCD (carb bolus fed)
- Obese-VLCD (fasted)
- Obese ADX (fed)
- Obese-ADX (fasted)

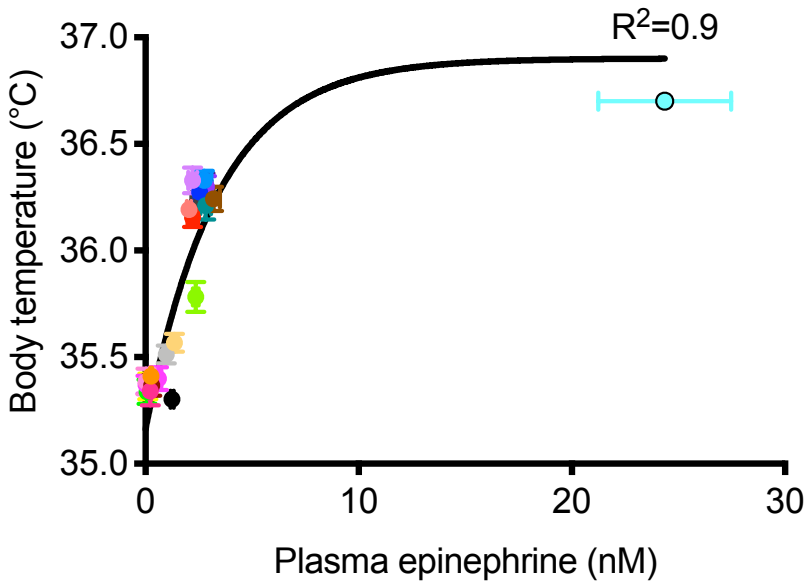

**Figure S14. The adrenomedullary response to leptin plateaus at levels observed in obese rodents, obviating the need for leptin resistance.** (A) Correlation between plasma epinephrine and plasma leptin concentrations. (B) Correlation between body temperature and plasma leptin concentrations. (C) Correlation between body temperature and plasma epinephrine concentrations. In all cases, correlations refer to the group mean of each analyte (all data points shown in previous figures). Data are the group mean  $\pm$  S.E.M.

# Figure S15

Original, uncut gels for Figure 5D

Brown adipose tissue Adr $\beta$ 3

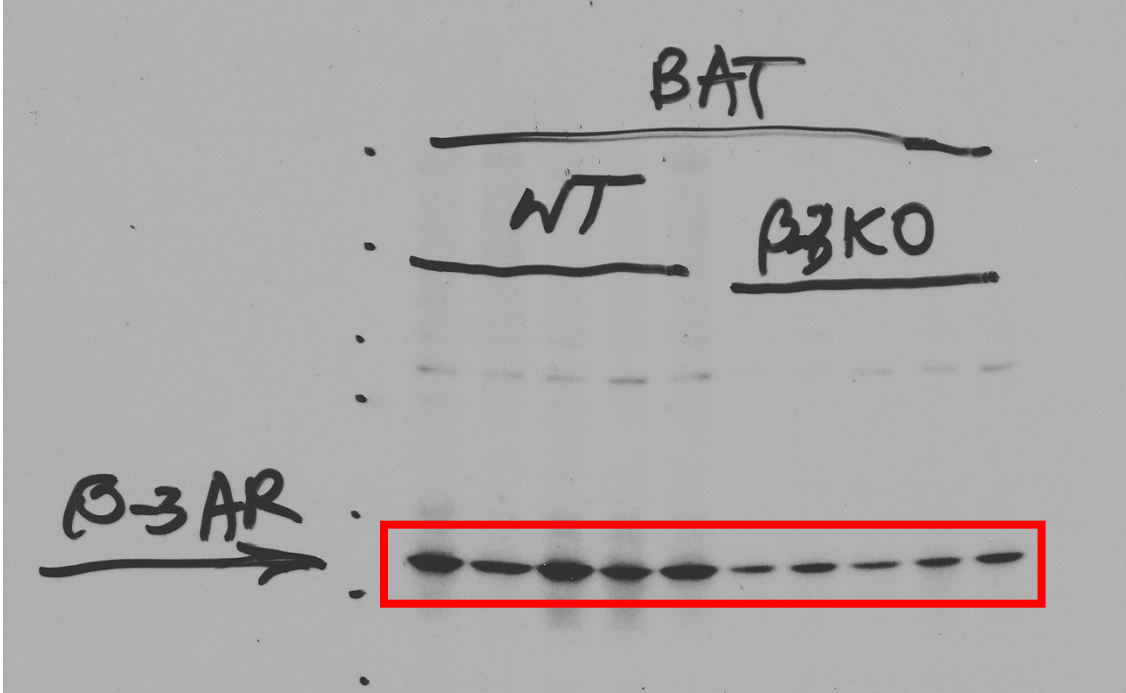

Brown adipose tissue HSP90 (loading control)

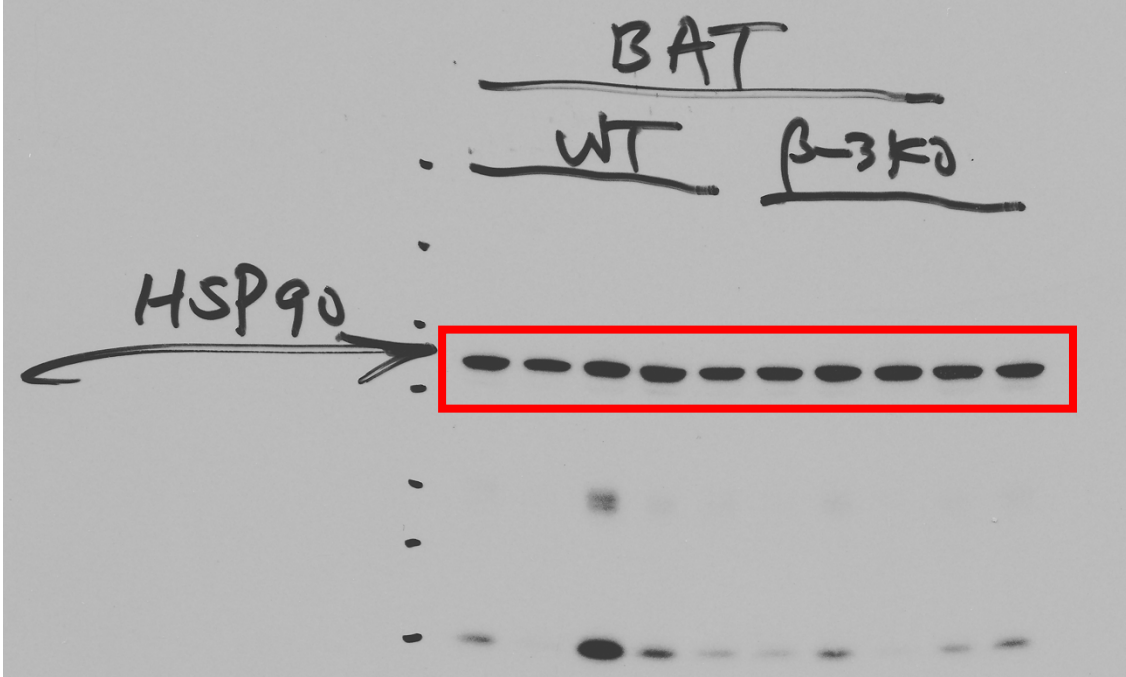

Original, uncut gels for Figure S5A

White adipose tissue OGT

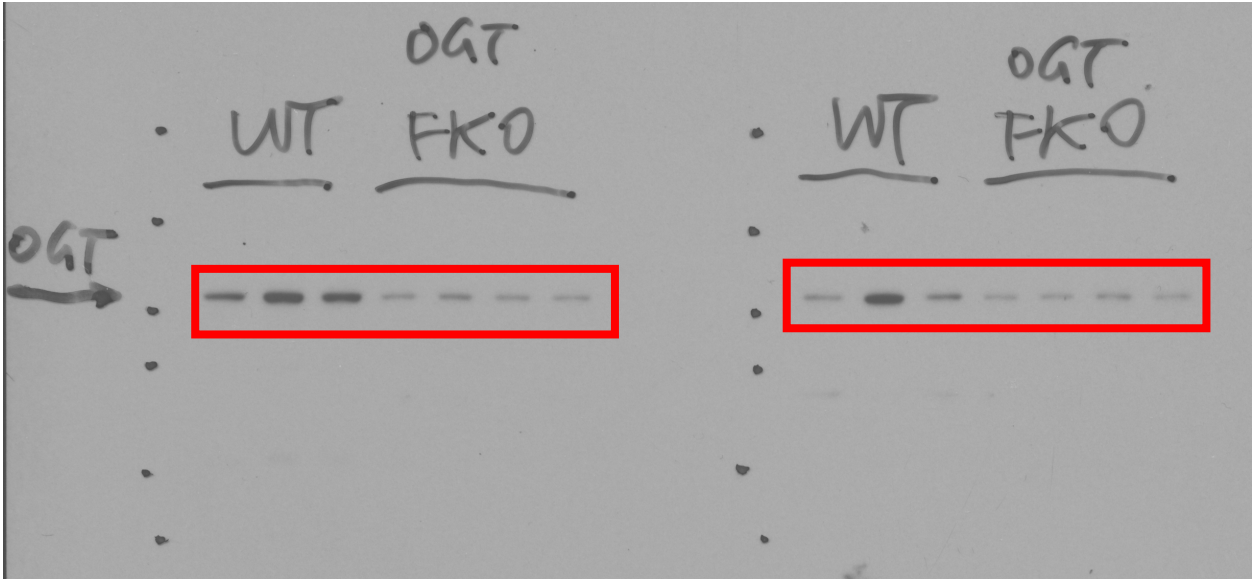

White adipose tissue GAPDH (loading control)

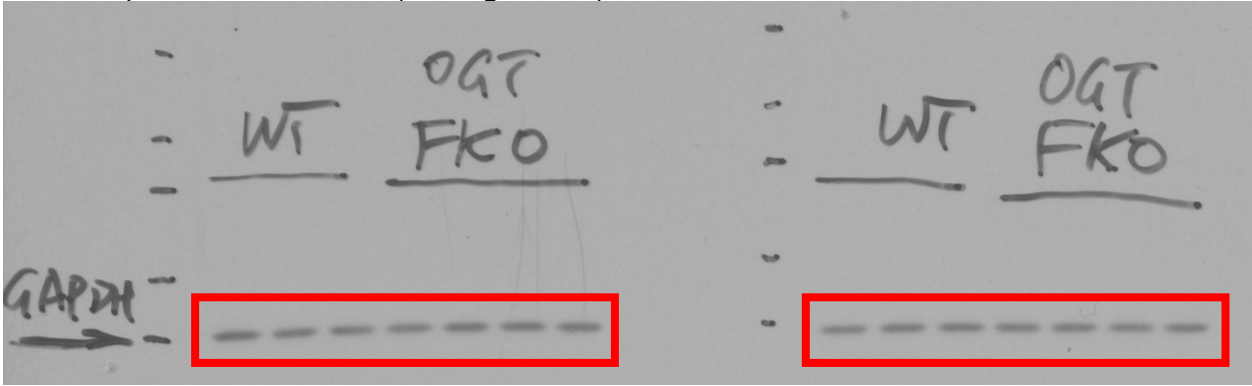

| CoA   | Sham      | Sham+epinephrine         | Sham+epinephrine+atglistatin | Sham+epinephrine+atglistatin+Liposyn |
|-------|-----------|--------------------------|------------------------------|--------------------------------------|
| C10   | 0.10±0.03 | 0.26±0.07                | 0.05±0.01 <sup>+</sup>       | 0.27±0.04 <sup>§</sup>               |
| C12:3 | 0.08±0.02 | 0.35±0.11                | 0.07±0.01                    | 0.44±0.19                            |
| C12:2 | 0.17±0.03 | 0.37±0.05 <sup>**</sup>  | 0.16±0.01 <sup>+</sup>       | 0.43±0.08 <sup>§§</sup>              |
| C12:1 | 0.11±0.02 | 0.90±0.30                | 0.07±0.01                    | 0.98±0.47                            |
| C12   | 0.20±0.07 | 1.11±0.33 <sup>*</sup>   | 0.11±0.02 <sup>+</sup>       | 0.96±0.22 <sup>§</sup>               |
| C14:3 | 0.19±0.02 | 0.52±0.06 <sup>*</sup>   | 0.17±0.01 <sup>+</sup>       | 0.61±0.14 <sup>**§§</sup>            |
| C14:2 | 0.30±0.05 | 1.02±0.21                | 0.18±0.02                    | 1.19±0.39 <sup>§</sup>               |
| C14:1 | 0.38±0.10 | 2.69±0.86                | 0.23±0.04                    | 3.08±1.24                            |
| C14   | 0.84±0.24 | 2.92±0.69 <sup>*</sup>   | 0.52±0.07 <sup>+</sup>       | 3.13±0.60 <sup>*,§§</sup>            |
| C16:3 | 0.12±0.02 | 0.78±0.26                | 0.08±0.01                    | 1.21±0.60                            |
| C16:2 | 0.43±0.09 | 2.63±0.98                | 0.22±0.04                    | 3.01±1.35                            |
| C16:1 | 1.47±0.32 | 7.68±2.12                | 1.18±0.14                    | 8.32±2.78                            |
| C16   | 4.58±0.79 | 10.02±1.21 <sup>**</sup> | 5.05±0.47 <sup>**</sup>      | 11.14±1.15 <sup>***§§</sup>          |
| C18:3 | 0.70±0.08 | 2.55±0.89                | 0.61±0.09                    | 3.79±1.65                            |
| C18:2 | 6.03±1.23 | 8.95±1.37                | 4.53±0.92                    | 14.66±3.44 <sup>*,§</sup>            |
| C18:1 | 6.25±0.76 | 15.36±2.00 <sup>**</sup> | 6.38±0.69 <sup>**</sup>      | 17.13±2.65 <sup>**§§</sup>           |
| C18   | 2.62±0.39 | 6.77±0.89 <sup>**</sup>  | 2.25±0.17 <sup>**</sup>      | 7.23±1.07 <sup>**§§§</sup>           |
| C20:5 | 0.23±0.05 | 0.43±0.09                | 0.15±0.03                    | 0.60±0.13 <sup>*,§§</sup>            |
| C20:4 | 1.15±0.33 | 1.69±0.29                | 0.70±0.14                    | 2.33±0.36 <sup>§§</sup>              |
| C22:6 | 0.21±0.08 | 0.27±0.07                | 0.15±0.03                    | 0.33±0.10                            |

**Table S1. Lipolysis is required for the thermogenic response to epinephrine.** BAT long-chain acyl-CoA species. \* $P < 0.05$ , \*\* $P < 0.01$ , \*\*\* $P < 0.001$  vs. sham; + $P < 0.05$ , ++ $P < 0.01$  vs. sham+epinephrine; § $P < 0.05$ , §§ $P < 0.01$ , §§§ $P < 0.001$  vs. sham+epinephrine+atglistatin. The

predominant lipid species in Liposyn is soybean oil (C18:2). Total long-chain acyl-CoA concentrations from these rats can be found in Fig. 5D. n=6 per group, with data representing the mean±S.E.M. If no symbol appears, groups are not statistically different.
